# Supplementary material for: Clinical trial data sharing: here’s the challenge
Source: PubMed Central journal article supplement — BMJ Open. 2019 Aug 21;9(8):e032334. doi: 10.1136/bmjopen-2019-032334 (PMC6707678; doi:10.1136/bmjopen-2019-032334), 2019-08-21
Supplement: bmjopen-2019-032334.draft_revisions.pdf [file bmjopen-2019-032334.draft_revisions.pdf]

# BMJ Open

BMJ Open is committed to open peer review. As part of this commitment we make the peer review history of every article we publish publicly available.

When an article is published we post the peer reviewers' comments and the authors' responses online. We also post the versions of the paper that were used during peer review. These are the versions that the peer review comments apply to.

The versions of the paper that follow are the versions that were submitted during the peer review process. They are not the versions of record or the final published versions. They should not be cited or distributed as the published version of this manuscript.

BMJ Open is an open access journal and the full, final, typeset and author-corrected version of record of the manuscript is available on our site with no access controls, subscription charges or pay-per-view fees (<http://bmjopen.bmj.com>).

If you have any questions on BMJ Open's open peer review process please email [info.bmjopen@bmj.com](mailto:info.bmjopen@bmj.com)

# BMJ Open

## Clinical Trial Data Sharing: Here's the Challenge

|                                 |                                                                                                                                                                                                                                                                                                                                                                                                                                                            |
|---------------------------------|------------------------------------------------------------------------------------------------------------------------------------------------------------------------------------------------------------------------------------------------------------------------------------------------------------------------------------------------------------------------------------------------------------------------------------------------------------|
| Journal:                        | <i>BMJ Open</i>                                                                                                                                                                                                                                                                                                                                                                                                                                            |
| Manuscript ID                   | bmjopen-2019-032334.R1                                                                                                                                                                                                                                                                                                                                                                                                                                     |
| Article Type:                   | Communication article                                                                                                                                                                                                                                                                                                                                                                                                                                      |
| Date Submitted by the Author:   | 20-Jun-2019                                                                                                                                                                                                                                                                                                                                                                                                                                                |
| Complete List of Authors:       | Kochhar, Sonali; Global Healthcare Consulting; Erasmus Medical Center, Dept Public Health<br>Knoppers, Bartha; McGill University, Center of Genomics and Policy<br>Gamble, Carrol; University of Liverpool, Biostatistics<br>Chant, Alan; UK Clinical Research Collaboration Board<br>Koplan, Jeffrey; Emory University, Emory Global Health Institute<br>Humphreys, Georgina; Wellcome Trust, Open Research; University of Oxford Green Templeton College |
| <b>Primary Subject Heading</b>: | Communication                                                                                                                                                                                                                                                                                                                                                                                                                                              |
| Secondary Subject Heading:      | Health informatics                                                                                                                                                                                                                                                                                                                                                                                                                                         |
| Keywords:                       | Data sharing, Clinical trials < THERAPEUTICS, Data re-use                                                                                                                                                                                                                                                                                                                                                                                                  |
|                                 |                                                                                                                                                                                                                                                                                                                                                                                                                                                            |

SCHOLARONE™  
Manuscripts

## 1 **Clinical Trial Data Sharing: Here's the Challenge**

2

3 Sonali Kochhar <sup>a, b, c</sup>, Bartha M Knoppers <sup>d</sup>, Carrol Gamble <sup>e</sup>, Alan Chant <sup>f</sup>, Jeffrey P Koplan <sup>g</sup>,  
4 Georgina S Humphreys <sup>h,i</sup>

5

6 <sup>a</sup> Global Healthcare Consulting, New Delhi, India

7 <sup>b</sup> Department of Public Health, Erasmus MC, University Medical Center, Rotterdam, The  
8 Netherlands

9 <sup>c</sup> Department of Global Health, University of Washington, Seattle, USA

10 <sup>d</sup> Center of Genomics and Policy, McGill University, Canada

11 <sup>e</sup> Department of Biostatistics, University of Liverpool, UK

12 <sup>f</sup> UK Clinical Research Collaboration Board, UK

13 <sup>g</sup> Emory Global Health Institute, Emory University, Atlanta, USA

14 <sup>h</sup> Wellcome Trust, London, UK

15 <sup>i</sup> Green Templeton College, University of Oxford, Oxford, UK

16

17 *Disclaimer:* The findings, opinions, conclusions, and assertions contained in this consensus  
18 document are those of the individual members. They do not necessarily represent the official  
19 positions of any participant's organization.

20

1  
2  
3 **21 Abstract**  
4

5  
6 **22** Anonymized patient-level data from clinical research is increasingly recognized as a fundamental  
7  
8 **23** and valuable resource. It has value beyond the original research project and can help drive  
9  
10 **24** scientific research and innovations and improve patient care. To support responsible data sharing  
11  
12 **25** we need to develop systems that work for all stakeholders. The members of the Independent  
13  
14 **26** Review Panel (IRP) for the data sharing platform Clinical Study Data Request (CSDR) describe  
15  
16 **27** here some summary metrics from the platform, and challenge the research community on why the  
17  
18 **28** promised demand for data has not been observed. While acknowledging there are areas for  
19  
20 **29** improvement in speed of access and promotion of the platform, the total number of applications  
21  
22 **30** for access and the resulting publications have been low, and challenge the sustainability of this  
23  
24 **31** model. What are the barriers for data contributors and secondary analysis researchers? If this model  
25  
26 **32** does not work for all, what needs to be changed? One thing is clear; that data access can realize  
27  
28 **33** new and unforeseen contributions to knowledge and improve patient health, but this will not be  
29  
30 **34** achieved unless we build sustainable models together that work for all.  
31  
32  
33  
34  
35  
36  
37  
38  
39  
40  
41  
42  
43  
44  
45  
46  
47  
48  
49  
50  
51  
52  
53  
54  
55  
56  
57  
58  
59  
60

1  
2  
3 37 CSDR is a consortium of 14 international pharmaceutical companies (GSK, Astellas Pharma,  
4  
5 38 Bayer, Chugai, Eisai, Eli Lilly, Novartis, ONO, Roche, Sanofi, Sunovion, Shionogi Inc., UCB,  
6  
7  
8 39 and ViiV) and four academic research funders (The Wellcome Trust, The Bill & Melinda Gates  
9  
10 40 Foundation, The UK Medical Research Council and Cancer Research UK)<sup>1</sup>. It was launched in  
11  
12 41 2013 and currently lists anonymized patient data from 3358 studies on the platform, including 10  
13  
14 42 studies from academic funders. The mandate is to reduce the barriers to access and re-use data,  
15  
16 43 thereby facilitating data sharing in an equitable, transparent, and independent manner.  
17  
18  
19 44

20  
21 45 Many global initiatives actively promote and enable sharing of research data and most funders  
22  
23 46 mandate researchers to plan for sharing their data globally<sup>2,3,4</sup>. The European Medicines Agency  
24  
25 47 and US Food and Drug Administration have basic requirements in place for data disclosure and  
26  
27 48 clinical trial transparency. Trial participants' confidentiality and privacy need to be protected and  
28  
29 49 the terms of consent to participate in research respected. Managed access systems can help with  
30  
31 50 this, including an IRP's review of all requests for data access and having data sharing agreements  
32  
33 51 in place which place appropriate restrictions on data usage, though it should be recognized that  
34  
35 52 these systems add time to the process from application to data access.  
36  
37  
38  
39

40 53  
41  
42 54 CSDR's system allows researchers to request access to anonymized global clinical trial data from  
43  
44 55 multiple studies and sponsors. All data requests that pass initial administrative and data availability  
45  
46 56 checks are reviewed by an IRP, the secretariat for which is provided by Wellcome. Once access is  
47  
48 57 granted nearly all CSDR members restrict data access to a secure online analysis environment  
49  
50 58 which they say ensures patient privacy whilst maintaining the utility of the data for secondary  
51  
52 59 analysis. This system can limit the merging of data from other non-CSDR sources and the range  
53  
54  
55  
56  
57  
58  
59

1  
2  
3 60 of software available for researchers. Free access to data is usually granted for 12 months, with the  
4  
5 61 possibility of extension, and CSDR requires researchers to report on findings, which are then listed  
6  
7  
8 62 on the website.  
9

10 63

### 11 64 **CSDR metrics**

12  
13  
14 65 From 2014 to the end of Jan 2019, there were a total of 473 research proposals (RPs) submitted to  
15  
16  
17 66 CSDR. Of these, 364 met initial administrative and data availability checks. In reviewing  
18  
19 67 applications the IRP default position is to provide access, and they have approved 291 (84% of  
20  
21 68 those considered) and rejected 55. Thirty four of the rejected RPs were subsequently revised and  
22  
23  
24 69 re-submitted. The remaining RPs are either still in process, withdrawn or no response has been  
25  
26 70 received from the researchers (Figure 1). The most common reasons for rejection were unsuitable  
27  
28 71 statistical methods, too technical lay summaries, and insufficient information presented.  
29

30 72

31  
32  
33 73 Overall, the annual number of RPs submitted has remained fairly static with 70 submitted in 2014,  
34  
35 74 96(2015), 92(2016), 85(2017), and 97(2018). Researchers at institutions in over 30 different  
36  
37  
38 75 countries have submitted RPs, although 168 RPs have been from researchers based in the USA  
39  
40 76 (35%) and very few have been submitted from researchers based in low and middle income  
41  
42 77 countries.  
43

44 78

45  
46  
47 79 From January 2014 it became possible to request data from multiple sponsors and 17% (73/427)  
48  
49 80 of RPs have requested data from more than one sponsor. However, the median number of studies  
50  
51 81 per RP is 2 (1-5, 25<sup>th</sup>-75<sup>th</sup> percentile), with only a handful of RPs requesting a large number of  
52  
53  
54 82 studies (the biggest request involved 192 studies and 11 sponsors).  
55

1  
2  
3 83  
4  
5 84 Of the 90 research teams that completed their analysis more than 12 months ago, 41 (45%) have  
6  
7  
8 85 at least one publication, 28 (31%) are publishing soon and the remaining 21 have either not  
9  
10 86 published or not responded to reminders from CSDR. Although these numbers appear encouraging  
11  
12 87 in terms of converting access to data into publications of new findings, of concern are the 54 RPs  
13  
14 88 (24%) whose researchers were granted access but did not log into the analysis environment. It is  
15  
16 89 puzzling why this would happen, given the significant investment on both the part of the sponsors  
17  
18  
19 90 and the researchers in getting the RPs to this point in the process. CSDR is planning to contact  
20  
21 91 those researchers to understand their constraints and challenges.  
22  
23  
24 92

### 25 26 93 **Lessons learned**

27  
28 94 From an IRP's perspective, the lessons learned from the CSDR experience include the following:  
29  
30  
31 95

32  
33 96 CSDR is a valuable resource of data from pharmaceutical companies and academic research  
34  
35 97 funders which is available for free for researchers. However, it is an expensive and resource-  
36  
37 98 intensive task for trial sponsors to provide access to data through this managed access model and  
38  
39 99 this may challenge the long-term sustainability of such a platform.  
40  
41  
42 100

43  
44 101 Pharmaceutical companies and academic funders should pool resources to strengthen and  
45  
46 102 sustainably support data-sharing infrastructure and to develop and implement harmonized  
47  
48 103 principles, standards and best practices<sup>5</sup>. The portal cost for the sharing of data should not be  
49  
50 104 prohibitive for new data contributors.  
51  
52  
53 105

1  
2  
3 106 It is important that there is a transparent system in place for data access decisions to maintain  
4  
5 107 equity for all those that want to re-use data. The IRP and the secretariat support provided by  
6  
7  
8 108 Wellcome have been critical to ensuring a trusted and independent managed access system.  
9

10 109  
11  
12 110 Having an experienced and multi-disciplinary IRP with expertise in ethics, statistics,  
13  
14 111 epidemiology, clinical research and a lay member has helped to ensure that feedback is provided  
15  
16 112 to the data requesters, including suggestions for improvement of proposals, and to ensure all  
17  
18 113 proposals receive consistent review. The IRP's perspective is to encourage and facilitate data  
19  
20 114 sharing (unless there are significant reasons not to do so). The respected quality of the IRP service  
21  
22 115 has been demonstrated by a newer data sharing platform (Vivli), launched in 2018, requesting the  
23  
24 116 Wellcome IRP also be available for data contributors to their system. The Wellcome IRP accepted  
25  
26 117 this request and has already considered several proposals through this platform too, applying the  
27  
28 118 same criteria as for CSDR.  
29  
30

31  
32  
33 119  
34  
35 120 It would be helpful if consent for clinical research could, as far as possible, include provision for  
36  
37 121 further data use beyond the original study.<sup>5</sup> In the absence of specific legislation or professional  
38  
39 122 guidance, institutional ethics committees should also adopt consistent policies for the need (or not)  
40  
41 123 for ethics review for secondary use of anonymized data. This would clarify if ethics review is  
42  
43 124 needed (or not), increase the amount of data available for re-use, and decrease the time to access  
44  
45 125 the data.  
46  
47  
48

49 126  
50  
51 127 The data access process should be easily discoverable with transparent metrics for potential data  
52  
53 128 users. A common data sharing agreement should be available for all the data providers and once  
54  
55  
56  
57  
58  
59  
60



1  
2  
3 129 researchers from an institution have signed the agreement, it should be applicable for other  
4  
5 130 researchers from that institution (to decrease the time often taken by institutions negotiating  
6  
7  
8 131 changes to the agreement).  
9

10 132  
11  
12 133 The analysis environment must be easily usable by the researchers (including for merging multiple  
13  
14 134 datasets and statistical analysis) and not be expensive for the data providers. Increasing efficiency  
15  
16  
17 135 in the process to ensure that data access happens as soon as possible benefits the researchers  
18  
19 136 (currently the median time from submission to data access is 190 days in CSDR). It is critical that  
20  
21 137 researchers that get access to the data, report their results in a timely manner (e.g. within six months  
22  
23 138 of completion of data access), so that it helps to move the research field forward, and reduce  
24  
25  
26 139 research waste. Perhaps this should be mentioned in the data sharing agreement.  
27

28 140  
29  
30  
31 141 Some pharmaceutical companies had the fear that data might be accessed for competitive  
32  
33 142 advantage or to disprove trial results. In all the years of CSDR, these fears have been unfounded.  
34  
35 143 This should encourage other pharmaceutical companies to share their data.  
36

37 144  
38  
39  
40 145 Sharing of data on CSDR by academic funders is low and barriers to utilizing the strength of the  
41  
42 146 platform should be identified and addressed. The four academic funders who are CSDR members  
43  
44 147 are currently gathering feedback from their grantees about the challenges and support they need to  
45  
46 148 share clinical data. Other academic funders could encourage their grant holders to start sharing  
47  
48 149 their clinical research data utilizing this or similar platforms.  
49

50  
51 150

## 52 53 54 151 **Conclusions**

1  
2  
3 152 Sharing of anonymized, patient-level clinical trial data through platforms like CSDR advances  
4  
5 153 research and innovation. International pharmaceutical companies and academic funders are  
6  
7 154 making their data available for free to the research community in a transparent and equitable  
8  
9 155 manner. From our IRP perspective, while there are some areas for improvement for clinical data  
10  
11 156 sharing, to speed up the application process and to enable its value to be maximized, there are  
12  
13 157 numerous opportunities ahead. This is a readily available resource that we hope will continue to  
14  
15 158 develop to meet the needs of all stakeholders.  
16  
17  
18  
19  
20  
21  
22 160

1  
2  
3 161 **Authors' contributions:** All authors were involved in the conception, drafting, and revision of  
4  
5 162 the article.

6  
7  
8 163 **Funding:** This research received no specific grant from any funding agency in the public,  
9  
10 164 commercial or not-for-profit sectors

11  
12 165 **Competing interests:** GH is the secretariat for the Independent Review Panel and all other authors  
13  
14  
15 166 are members of the IRP.

16  
17 167

18  
19 168  
20  
21  
22  
23  
24  
25  
26  
27  
28  
29  
30  
31  
32  
33  
34  
35  
36  
37  
38  
39  
40  
41  
42  
43  
44  
45  
46  
47  
48  
49  
50  
51  
52  
53  
54  
55  
56  
57  
58  
59  
60

1  
2  
3 **169 References**  
4

- 5  
6 170 1. Clinical Study Data Request, Accessed on 12<sup>th</sup> June 19 at  
7  
8 171 <https://www.clinicalstudydatarequest.com/Default.aspx>  
9  
10 172 2. Institute of Medicine. Sharing Clinical Trial Data Maximizing Benefits, Minimizing Risk.  
11  
12 173 2015. Accessed on 12 June 19 at  
13  
14 174 [http://www.nationalacademies.org/hmd/~media/Files/Report%20Files/2015/SharingData/D](http://www.nationalacademies.org/hmd/~media/Files/Report%20Files/2015/SharingData/DataSharingReportBrief.pdf)  
15  
16 175 [ataSharingReportBrief.pdf](http://www.nationalacademies.org/hmd/~media/Files/Report%20Files/2015/SharingData/DataSharingReportBrief.pdf)  
17  
18  
19 176 3. Kiley R, Peatfield T, Hansen J, Reddington F. Data Sharing from Clinical Trials -  
20  
21 A Research Funder's Perspective. *N Engl J Med*. 2017; 377(20):1990-1992. doi:  
22 177 10.1056/NEJMs1708278.  
23  
24 178  
25  
26 179 4. Taichman DB, Backus J, Baethge C, et al. Sharing clinical trial data — a proposal from the  
27  
28 180 International Committee of Medical Journal Editors. *N Engl J Med* 2016; 374:384-386  
29  
30  
31 181 5. Burton PR, Banner N, Elliot MJ, Knoppers BM, Banks J. Policies and strategies to facilitate  
32  
33 182 secondary use of research data in the health sciences. *Int J Epidemiol*. 2017; 46(6):1729-1733.  
34  
35 183 doi: 10.1093/ije/dyx195.  
36  
37  
38 184  
39  
40 185  
41  
42 186  
43  
44 187  
45  
46 188  
47  
48 189  
49  
50 190  
51  
52 191  
53  
54  
55  
56  
57  
58  
59  
60

192 **Figure 1: Research Proposals progress through the CSDR system**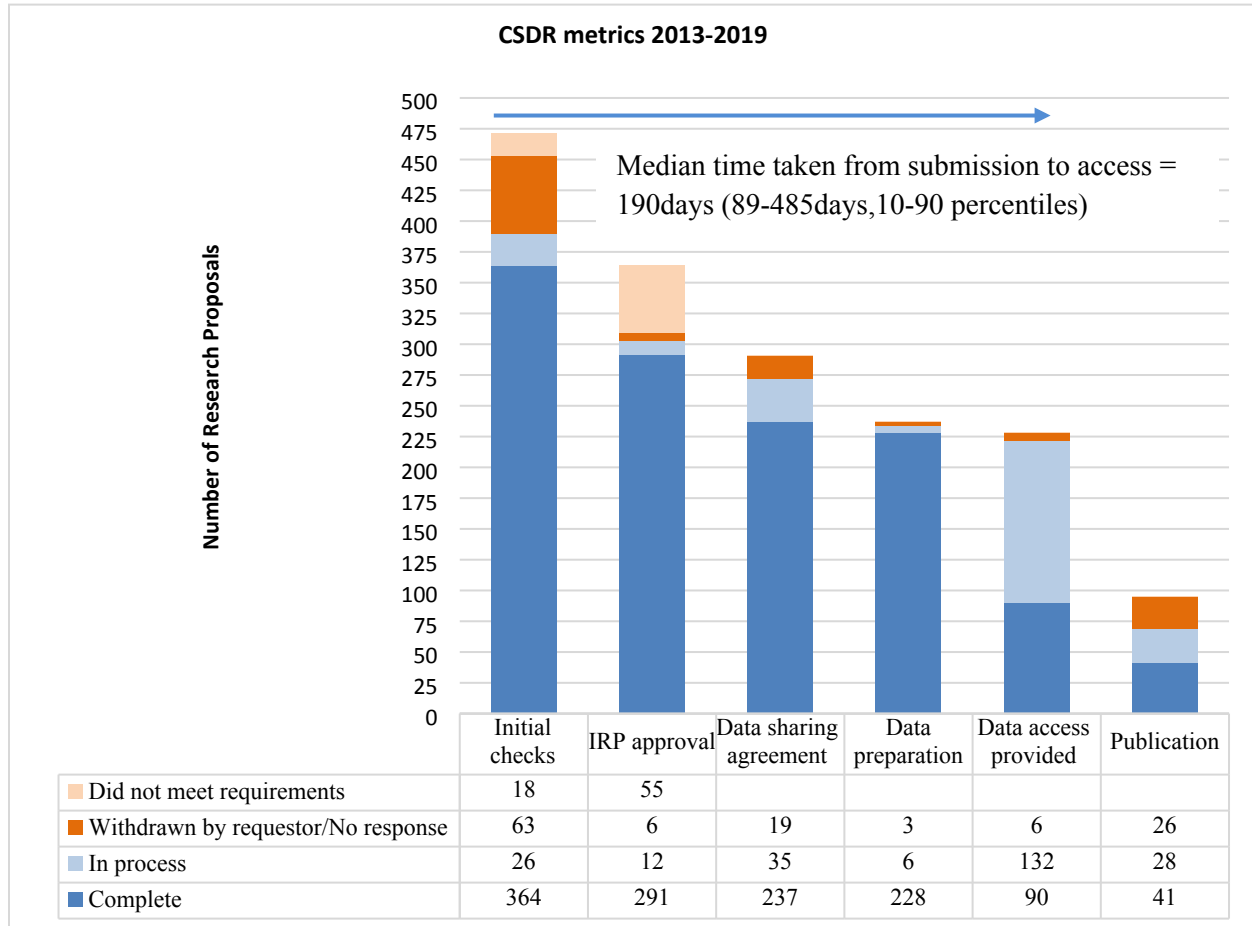

193

194 Of the 473 proposals submitted to CSDR (2013-Jan 2019), 123 were withdrawn by the requestor  
 195 at some point through the process. The IRP rejected 55, but 34 of these went on to re-submit  
 196 revised proposals following IRP suggestions for improvements. Of the 222 that gained access to  
 197 the data (in process and completed) 41 have published at least one paper, with another 28  
 198 expecting to publish soon.

199

200

# BMJ Open

## Clinical Trial Data Sharing: Here's the Challenge

|                                 |                                                                                                                                                                                                                                                                                                                                                                                                                                                            |
|---------------------------------|------------------------------------------------------------------------------------------------------------------------------------------------------------------------------------------------------------------------------------------------------------------------------------------------------------------------------------------------------------------------------------------------------------------------------------------------------------|
| Journal:                        | <i>BMJ Open</i>                                                                                                                                                                                                                                                                                                                                                                                                                                            |
| Manuscript ID                   | bmjopen-2019-032334.R2                                                                                                                                                                                                                                                                                                                                                                                                                                     |
| Article Type:                   | Communication                                                                                                                                                                                                                                                                                                                                                                                                                                              |
| Date Submitted by the Author:   | 25-Jul-2019                                                                                                                                                                                                                                                                                                                                                                                                                                                |
| Complete List of Authors:       | Kochhar, Sonali; Global Healthcare Consulting; Erasmus Medical Center, Dept Public Health<br>Knoppers, Bartha; McGill University, Center of Genomics and Policy<br>Gamble, Carrol; University of Liverpool, Biostatistics<br>Chant, Alan; UK Clinical Research Collaboration Board<br>Koplan, Jeffrey; Emory University, Emory Global Health Institute<br>Humphreys, Georgina; Wellcome Trust, Open Research; University of Oxford Green Templeton College |
| <b>Primary Subject Heading</b>: | Communication                                                                                                                                                                                                                                                                                                                                                                                                                                              |
| Secondary Subject Heading:      | Health informatics                                                                                                                                                                                                                                                                                                                                                                                                                                         |
| Keywords:                       | Data sharing, Clinical trials < THERAPEUTICS, Data re-use                                                                                                                                                                                                                                                                                                                                                                                                  |
|                                 |                                                                                                                                                                                                                                                                                                                                                                                                                                                            |

SCHOLARONE™  
Manuscripts

## 1 **Clinical Trial Data Sharing: Here's the Challenge**

2  
3  
4  
5  
6  
7  
8 3 Sonali Kochhar <sup>a, b, c</sup>, Bartha M Knoppers <sup>d</sup>, Carrol Gamble <sup>e</sup>, Alan Chant <sup>f</sup>, Jeffrey P Koplan <sup>g</sup>,  
9  
10 4 Georgina S Humphreys <sup>h,i</sup>

11  
12  
13  
14  
15 6 <sup>a</sup> Global Healthcare Consulting, New Delhi, India

16  
17 7 <sup>b</sup> Department of Public Health, Erasmus MC, University Medical Center, Rotterdam, The  
18  
19 8 Netherlands

20  
21  
22 9 <sup>c</sup> Department of Global Health, University of Washington, Seattle, USA

23  
24 10 <sup>d</sup> Center of Genomics and Policy, McGill University, Canada

25  
26 11 <sup>e</sup> Department of Biostatistics, University of Liverpool, UK

27  
28 12 <sup>f</sup> UK Clinical Research Collaboration Board, UK

29  
30  
31 13 <sup>g</sup> Emory Global Health Institute, Emory University, Atlanta, USA

32  
33 14 <sup>h</sup> Wellcome Trust, London, UK

34  
35 15 <sup>i</sup> Green Templeton College, University of Oxford, Oxford, UK: georginahumphreys@gmail.com

36  
37  
38  
39  
40  
41  
42 18 *Disclaimer:* The findings, opinions, conclusions, and assertions contained in this consensus  
43  
44 19 document are those of the individual members. They do not necessarily represent the official  
45  
46 20 positions of any participant's organization.

47  
48  
49  
50  
51 22 Word count 2,171

## 23 **Abstract**

### 24 Objective

25 Anonymized patient-level data from clinical research are increasingly recognized as a fundamental  
26 and valuable resource. It has value beyond the original research project and can help drive  
27 scientific research and innovations and improve patient care. To support responsible data sharing  
28 we need to develop systems that work for all stakeholders. The members of the Independent  
29 Review Panel (IRP) for the data sharing platform Clinical Study Data Request (CSDR) describe  
30 here some summary metrics from the platform and challenge the research community on why the  
31 promised demand for data has not been observed.

### 32 Summary of data

33 From 2014 to the end of Jan 2019, there were a total of 473 research proposals (RPs) submitted to  
34 CSDR. Of these, 364 met initial administrative and data availability checks, and the IRP approved  
35 291. Of the 90 research teams that had completed their analyses by Jan 2018, 41 reported at least  
36 one resulting publication to CSDR. Less than half of the studies ever listed on CSDR have been  
37 requested.

### 38 Conclusion

39 While acknowledging there are areas for improvement in speed of access and promotion of the  
40 platform, the total number of applications for access and the resulting publications have been low  
41 and challenge the sustainability of this model. What are the barriers for data contributors and  
42 secondary analysis researchers? If this model does not work for all, what needs to be changed?  
43 One thing is clear; that data access can realize new and unforeseen contributions to knowledge and  
44 improve patient health, but this will not be achieved unless we build sustainable models together  
45 that work for all.



1  
2  
3 46 CSDR is a consortium of 13 international pharmaceutical companies (GSK, Astellas Pharma,  
4  
5 47 Bayer, Chugai, Eisai, Novartis, ONO, Roche, Sanofi, Sunovion, Shionogi Inc., UCB, and ViiV)  
6  
7  
8 48 and four academic research funders (The Wellcome Trust, The Bill & Melinda Gates Foundation,  
9  
10 49 The UK Medical Research Council and Cancer Research UK)<sup>1</sup>. It was launched in 2013 and  
11  
12 50 currently lists anonymized patient data from 3374 studies on the platform, including 10 studies  
13  
14 51 from academic funders. The mandate is to reduce the barriers to access and re-use data, thereby  
15  
16 52 facilitating data sharing in an equitable, transparent, and independent manner.  
17  
18  
19 53

20  
21 54 Clinical trial data can be utilized beyond the original purpose for which it was generated, including  
22  
23 55 for analysis of new hypotheses, avoiding duplicative research, ensuring reproducibility, and to  
24  
25 56 drive scientific research and innovations to improve patient care. As the value of clinical data is  
26  
27 57 now widely recognized, many global initiatives actively promote and enable sharing of research  
28  
29 58 data and most funders mandate researchers to plan for sharing their data<sup>2,3,4</sup>. The European  
30  
31 59 Medicines Agency and the National Institutes of Health have requirements in place for data  
32  
33 60 disclosure and clinical trial transparency<sup>5</sup>. Trial participants' confidentiality and privacy need to  
34  
35 61 be protected and the terms of consent to participate in research respected. Managed access systems  
36  
37 62 can help with this, including an IRP's review of all requests for data access and having data sharing  
38  
39 63 agreements in place which place appropriate restrictions on data usage, though it should be  
40  
41 64 recognized that these systems add time to the process from application to data access.  
42  
43  
44  
45  
46  
47  
48

49 66 CSDR's system allows researchers to request access to anonymized global clinical trial data from  
50  
51 67 multiple studies and sponsors. All data requests that pass initial administrative and data availability  
52  
53 68 checks are reviewed by an IRP, the secretariat for which is provided by Wellcome. Once access is  
54  
55  
56  
57  
58  
59  
60

1  
2  
3 69 granted nearly all CSDR members restrict data access to a secure online analysis environment  
4  
5 70 which they say ensures patient privacy whilst maintaining the utility of the data for secondary  
6  
7 71 analysis. This system can limit the merging of data from other non-CSDR sources and the range  
8  
9  
10 72 of software available for researchers. Free access to data is usually granted for 12 months, with the  
11  
12 73 possibility of extension, and CSDR requires researchers to report on findings, which are then listed  
13  
14  
15 74 on the website.  
16  
17 75

## 19 76 **CSDR metrics**

20  
21 77 From 2014 to the end of Jan 2019, there were a total of 473 research proposals (RPs) submitted to  
22  
23 78 CSDR. Of these, 364 met initial administrative and feasibility checks from the sponsors. Although  
24  
25  
26 79 the sponsors have a right to veto a request on the grounds of potential conflict of interest or  
27  
28 80 competitive risk, this veto has never been used. In reviewing applications, the IRP default position  
29  
30  
31 81 is to provide access, and they have approved 291 (84% of those considered) and rejected 55.  
32  
33 82 Thirty-four of the rejected RPs were subsequently revised and re-submitted. The remaining RPs  
34  
35 83 are either still in process, withdrawn or no response has been received from the researchers (Figure  
36  
37  
38 84 1). The most common reasons for rejection were unclear or unsuitable statistical methods (e.g. a  
39  
40 85 lack of detail on: the exact meta-analytic method proposed, how models will be validated, or how  
41  
42 86 data from different study designs and sites can be combined), too technical lay summaries, and  
43  
44  
45 87 insufficient information presented.  
46  
47 88

48  
49 89 Overall, the annual number of RPs submitted has remained fairly static with 70 submitted in 2014,  
50  
51 90 96(2015), 92(2016), 85(2017), and 97(2018). Researchers at institutions in over 30 different  
52  
53  
54 91 countries have submitted RPs, although 168 RPs have been from researchers based in the USA  
55  
56  
57  
58  
59  
60

92 (35%) and very few have been submitted from researchers based in low- and middle-income  
93 countries.

94  
95 From January 2014 it became possible to request data from multiple sponsors and 17% (73/427)  
96 of RPs have requested data from more than one sponsor. However, the median number of studies  
97 per RP is 2 (1-5, 25<sup>th</sup>-75<sup>th</sup> percentile), with only a handful of RPs requesting a large number of  
98 studies (the biggest request involved 192 studies and 11 sponsors).

99  
100 Of the >4000 studies ever listed on CSDR (over the years studies have been listed and then  
101 removed when sponsors leave the platform), 1457 have been requested. Interestingly the majority  
102 (1157, 79%) have been requested only once or twice, but four have been requested more than 10  
103 times (NCT00153062, NCT00268216, NCT00410384 which was always requested along with  
104 NCT00424476).

105  
106 Of the 90 research teams that completed their analysis by January 2018, 41 (45%) have at least  
107 one publication, 28 (31%) are publishing soon and the remaining 21 have either not published or  
108 not responded to reminders from CSDR. Although these numbers appear encouraging in terms of  
109 converting access to data into publications of new findings, of concern are the 54 RPs (24%) whose  
110 researchers were granted access but did not log into the analysis environment. It is puzzling why  
111 this would happen, given the significant investment on both the part of the sponsors and the  
112 researchers in getting the RPs to this point in the process. CSDR is planning to contact those  
113 researchers to understand their constraints and challenges.

114

## 115 **Lessons learned**

116 From an IRP's perspective, the lessons learned from the CSDR experience include the following:

117  
118 CSDR is a valuable resource of data from pharmaceutical companies and academic research  
119 funders which is available for free for researchers. However, it is an expensive and resource-  
120 intensive task for trial sponsors to provide access to data through this managed access model when  
121 it involves secure analysis environments with licensed software, and this may challenge the long-  
122 term sustainability of such a platform. With over 50% of studies never being requested, perhaps  
123 more resources need to be focused on driving the re-use of data. Research agendas informed by  
124 the whole community could drive the sharing and re-use of data for specific questions that are of  
125 the highest priority for health practice, although this does limit the resource to current thinking on  
126 what is most interesting. The research programmes of the Project Data Sphere cancer data sharing  
127 platform is an example of how this model could work<sup>6</sup>.

128  
129 Pharmaceutical companies and academic funders should pool resources to strengthen and  
130 sustainably support data-sharing infrastructure and to develop and implement harmonized  
131 principles, standards and best practices<sup>7</sup>. The portal cost for the sharing of data should not be  
132 prohibitive for new data contributors.

133  
134 It is important that there is a transparent system in place for data access decisions to maintain  
135 equity for all those that want to re-use data. There is a minimum requirement for sufficient  
136 statistical skills within the team requesting access to carry out the research proposed, and this may  
137 mean there is currently a bias towards higher resourced settings. Funders should consider

1  
2  
3 138 supporting capacity building efforts to increase the data analysis expertise of teams based in low-  
4  
5 139 and middle-income settings.  
6  
7

8 140  
9  
10 141 The IRP and the secretariat support provided by Wellcome have been critical to ensuring a trusted  
11  
12 142 and independent managed access system. Having an experienced and multi-disciplinary IRP with  
13  
14 143 expertise in ethics, statistics, epidemiology, clinical research and a lay member has helped to  
15  
16 144 ensure that feedback is provided to the data requesters, including suggestions for how to improve  
17  
18 145 proposals with respect to the analysis methods and the clarity of how the research will benefit  
19  
20 146 patients, and to ensure all proposals receive consistent review. The IRP's perspective is to  
21  
22 147 encourage and facilitate data sharing (unless there are significant reasons not to do so). The  
23  
24 148 respected quality of the IRP service has been demonstrated by a newer data sharing platform  
25  
26 149 (Vivli), launched in 2018, requesting the Wellcome IRP also be available for data contributors to  
27  
28 150 their system. The IRP accepted this request and has already considered several proposals through  
29  
30 151 this platform too, applying the same criteria as for CSDR.  
31  
32  
33  
34  
35  
36

37 152  
38 153 It would be helpful if consent for clinical research could, as far as possible, include provision for  
39  
40 154 re-use of their anonymized data beyond the original study<sup>7</sup>. In the absence of specific guidance,  
41  
42 155 institutional ethics committees should also adopt consistent policies for the need (or not) for ethics  
43  
44 156 review for secondary use of anonymized data. This would clarify if ethics review is needed (or  
45  
46 157 not), increase the amount of data available for re-use, and decrease the time to access the data.  
47  
48 158 Data generators might also feel reassured about using a file transfer model rather than restricting  
49  
50 159 to the use of a controlled analysis environment.  
51  
52  
53

54 160  
55  
56  
57  
58  
59  
60

1  
2  
3 161 The data access process should be easily discoverable with transparent metrics for potential data  
4  
5 162 users. A common data sharing agreement should be available for all the data providers and once  
6  
7  
8 163 researchers from an institution have signed the agreement, it should be applicable for other  
9  
10 164 researchers from that institution (to decrease the time often taken by institutions negotiating  
11  
12 165 changes to the agreement).

13  
14 166  
15  
16  
17 167 Merging multiple datasets is critical for finding small or subpopulation effects that could not have  
18  
19 168 been observed from any individual trial alone. However, the resource involved in pooling, or even  
20  
21 169 finding suitable data can be prohibitive if there are no common standards used. CSDR industry  
22  
23 170 sponsors mostly all use Clinical Data Interchange Standards Consortium (CDISC) standards<sup>8</sup> but  
24  
25 171 the academic research community do not currently employ agreed standards which is barrier to  
26  
27 172 truly accessible and interoperable data.

28  
29  
30  
31 173  
32  
33 174 The analysis environment must be easily usable by the researchers (including for merging multiple  
34  
35 175 datasets and statistical analysis) and not be expensive for the data providers. Increasing efficiency  
36  
37 176 in the process to ensure that data access happens as soon as possible benefits the researchers  
38  
39 177 (currently the median time from submission to data access is 190 days in CSDR). It is critical that  
40  
41 178 researchers that get access to the data, report their results in a timely manner (e.g. within six months  
42  
43 179 of completion of data access), so that it helps to move the research field forward, and reduce  
44  
45 180 research waste. This should be a requirement in the data sharing agreement.

46  
47  
48  
49 181  
50  
51  
52  
53  
54  
55  
56  
57  
58  
59  
60

1  
2  
3 182 Some pharmaceutical companies had the fear that data might be accessed for competitive  
4  
5 183 advantage or to disprove trial results. In all the years of CSDR, these fears have been unfounded.  
6  
7  
8 184 This should encourage other pharmaceutical companies to share their data.  
9

10 185  
11  
12 186 Sharing of data on CSDR by academic funders is low and barriers to utilizing the strength of the  
13  
14 187 platform should be identified and addressed. The four academic funders who are CSDR members  
15  
16 188 are currently gathering feedback from their grantees about the challenges and support they need to  
17  
18 189 share clinical data. Other academic funders could encourage their grant holders to start sharing  
19  
20 190 their clinical research data utilizing this or similar platforms.  
21  
22  
23

24 191

## 25 26 192 **Conclusions**

27  
28 193 Sharing of anonymized, patient-level clinical trial data through platforms like CSDR advances  
29  
30 194 research and innovation. International pharmaceutical companies and academic funders are  
31  
32 195 making their data available for free to the research community in a transparent and equitable  
33  
34 196 manner. Challenges still remain to speed up the process and enable data value to be maximized.  
35  
36 197 Researchers need incentives to share, such as citation of their data (which requires unique  
37  
38 198 identifiers to be embedded) being recognized by funders and institutions in decision making. The  
39  
40 199 costs of sharing and re-use need to decrease which will be helped by adoption of standards in the  
41  
42 200 creation of data, and reduced use of controlled analysis environments. Guidance from professional  
43  
44 201 bodies addressing, for example, consent issues and common data sharing agreements would help  
45  
46 202 promote data sharing. Despite these challenges great advances have already been made, and  
47  
48 203 models developed that mean there are more clinical trial data available for re-use than ever before.  
49  
50  
51 204 We hope this field will continue to develop to meet the needs of all stakeholders.  
52  
53  
54  
55  
56  
57  
58  
59  
60

1  
2  
3 205 **Authors' contributions:** SK, BK, CG, AC, JK, and GH were involved in the conception, drafting,  
4  
5 206 and revision of the article.  
6

7  
8 207 **Funding:** This research received no specific grant from any funding agency in the public,  
9  
10 208 commercial or not-for-profit sectors  
11

12 209 **Competing interests:** GH is the secretariat for the Independent Review Panel and all other authors  
13  
14 210 are members of the IRP.  
15  
16 211

## 19 212 **References**

- 21 213 1. Clinical Study Data Request, Accessed on 20 July 19 at  
22  
23 214 <https://www.clinicalstudydatarequest.com/Default.aspx>  
24  
25 215 2. Institute of Medicine. Sharing Clinical Trial Data Maximizing Benefits, Minimizing Risk. 2015.  
26  
27 216 Accessed on 20 July 19 at  
28  
29 217 [http://www.nationalacademies.org/hmd/~media/Files/Report%20Files/2015/SharingData/DataShari](http://www.nationalacademies.org/hmd/~media/Files/Report%20Files/2015/SharingData/DataSharingReportBrief.pdf)  
30  
31 218 [ngReportBrief.pdf](http://www.nationalacademies.org/hmd/~media/Files/Report%20Files/2015/SharingData/DataSharingReportBrief.pdf)  
32  
33 219 3. Kiley R, Peatfield T, Hansen J, Reddington F. Data Sharing from Clinical Trials -  
34  
35 220 A Research Funder's Perspective. N Engl J Med. 2017; 377(20):1990-1992. doi:  
36  
37 221 10.1056/NEJMsbl708278.  
38  
39 222 4. Taichman DB, Backus J, Baethge C, et al. Sharing clinical trial data — a proposal from the  
40  
41 223 International Committee of Medical Journal Editors. N Engl J Med 2016; 374:384-386  
42  
43 224 5. National Institute for Health sharing policies. Accessed on 16 July 2019 at  
44  
45 225 <https://grants.nih.gov/policy/sharing.htm>  
46  
47 226 6. Project Data Sphere. Accessed 20 Jul 2019 at  
48  
49 227 <https://www.projectdatasphere.org/projectdatasphere/html/home>  
50  
51  
52  
53  
54  
55  
56  
57  
58  
59  
60



- 1  
2  
3 228 7. Burton PR, Banner N, Elliot MJ, Knoppers BM, Banks J. Policies and strategies to facilitate  
4  
5 229 secondary use of research data in the health sciences. *Int J Epidemiol.* 2017; 46(6):1729-1733. doi:  
6  
7 230 10.1093/ije/dyx195  
8  
9 231 8. CDISC Standards in the Clinical Research Process. Accessed on 20 July 19 at  
10  
11 232 <https://www.cdisc.org/standards>  
12  
13  
14  
15 233

16  
17 234 **Figure 1: The progress of Research Proposals through the CSDR system**

18  
19 235 Of the 473 proposals submitted to CSDR (2013-Jan 2019), 123 were withdrawn by the requestor  
20  
21 236 at some point through the process. The IRP rejected 55, but 34 of these went on to re-submit  
22  
23 237 revised proposals following IRP suggestions for improvements. Of the 222 that gained access to  
24  
25 238 the data (in progress and completed) 41 have published at least one paper, with another 28  
26  
27 239 expecting to publish soon.  
28  
29  
30

31 240

32  
33  
34 241  
35  
36  
37  
38  
39  
40  
41  
42  
43  
44  
45  
46  
47  
48  
49  
50  
51  
52  
53  
54  
55  
56  
57  
58  
59  
60

1  
2  
3  
4  
5  
6  
7  
8  
9  
10  
11  
12  
13  
14  
15  
16  
17  
18  
19  
20  
21  
22  
23  
24  
25  
26  
27  
28  
29  
30  
31  
32  
33  
34  
35  
36  
37  
38  
39  
40  
41  
42  
43  
44  
45  
46  
47  
48  
49  
50  
51  
52  
53  
54  
55  
56  
57  
58  
59  
60

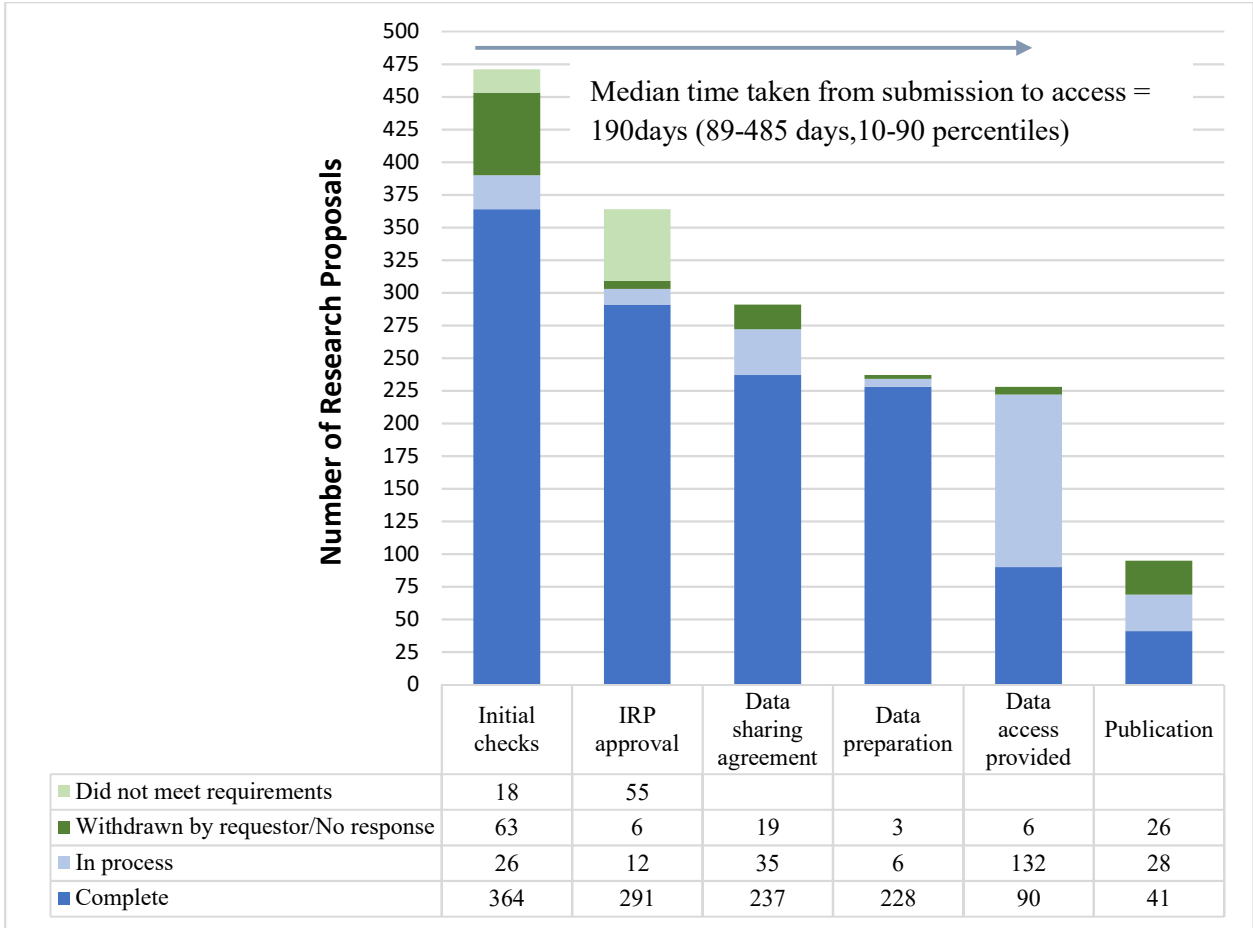

view only
